# Supplementary material for: Novel Aptamer-Based Small-Molecule Drug Screening Assay to Identify Potential Sclerostin Inhibitors against Osteoporosis
Source: MDPI journal article supplement (doi:10.3390/ijms22158320), 2021-08-02
Supplement: s1 [file s1]

**Table S1** List of compounds selected from commercial chemical libraries for the aptamer-based competitive drug screening assay designed in this study

| Product name                                                  | Molecular weight | CAS number   | Formula                                                                         | Target                              |
|---------------------------------------------------------------|------------------|--------------|---------------------------------------------------------------------------------|-------------------------------------|
| <b>Compounds containing at least one tertiary amino group</b> |                  |              |                                                                                 |                                     |
| Methotrexate*                                                 | 454.44           | 59-05-2      | C <sub>20</sub> H <sub>22</sub> N <sub>8</sub> O <sub>5</sub>                   | Dihydrofolate reductase             |
| Ketoconazole*                                                 | 531.43           | 65277-42-1   | C <sub>26</sub> H <sub>28</sub> Cl <sub>2</sub> N <sub>4</sub> O <sub>4</sub>   | Cytochrome P450                     |
| Sildenafil citrate*                                           | 666.7            | 171599-83-0  | C <sub>28</sub> H <sub>38</sub> N <sub>6</sub> O <sub>11</sub> S                | Phosphodiesterase                   |
| Mycophenolate mofetil*                                        | 433.49           | 128794-94-5  | C <sub>23</sub> H <sub>31</sub> NO <sub>7</sub>                                 | Inosine monophosphate dehydrogenase |
| Dyphylline*                                                   | 254.24           | 479-18-5     | C <sub>10</sub> H <sub>14</sub> N <sub>4</sub> O <sub>4</sub>                   | Phosphodiesterase                   |
| Tadalafil*                                                    | 389.4            | 171596-29-5  | C <sub>22</sub> H <sub>19</sub> N <sub>3</sub> O <sub>4</sub>                   | Phosphodiesterase                   |
| Apixaban*                                                     | 459.5            | 503612-47-3  | C <sub>25</sub> H <sub>25</sub> N <sub>5</sub> O <sub>4</sub>                   | Factor Xa                           |
| Aminophylline*                                                | 420.43           | 317-34-0     | C <sub>16</sub> H <sub>24</sub> N <sub>10</sub> O <sub>4</sub>                  | Phosphodiesterase                   |
| Fluvastatin sodium*                                           | 433.45           | 93957-55-2   | C <sub>24</sub> H <sub>25</sub> FNNaO <sub>4</sub>                              | HMG-CoA Reductase                   |
| Atorvastatin calcium*                                         | 1155.34          | 134523-03-8  | C <sub>66</sub> H <sub>68</sub> CaF <sub>2</sub> N <sub>4</sub> O <sub>10</sub> | HMG-CoA Reductase                   |
| Ozagrel*                                                      | 228.25           | 82571-53-7   | C <sub>13</sub> H <sub>12</sub> N <sub>2</sub> O <sub>2</sub>                   | Factor Xa                           |
| Vardenafil HCl trihydrate*                                    | 579.11           | 224785-90-4  | C <sub>23</sub> H <sub>39</sub> ClN <sub>6</sub> O <sub>7</sub> S               | Phosphodiesterase                   |
| Clarithromycin*                                               | 747.95           | 81103-11-9   | C <sub>38</sub> H <sub>69</sub> NO <sub>13</sub>                                | Cytochrome P450                     |
| Cobicistat (GS-9350)*                                         | 776.02           | 1004316-88-4 | C <sub>40</sub> H <sub>53</sub> N <sub>7</sub> O <sub>5</sub> S <sub>2</sub>    | Cytochrome P450 (e.g. CYP17)        |
| Rivaroxaban*                                                  | 435.88           | 366789-02-8  | C <sub>19</sub> H <sub>18</sub> ClN <sub>3</sub> O <sub>5</sub> S               | Factor Xa                           |
| Anagrelide HCl*                                               | 292.55           | 58579-51-4   | C <sub>10</sub> H <sub>8</sub> Cl <sub>3</sub> N <sub>3</sub> O                 | Phosphodiesterase                   |
| Moclobemide (Ro 111163)*                                      | 268.74           | 71320-77-9   | C <sub>13</sub> H <sub>17</sub> ClN <sub>2</sub> O <sub>2</sub>                 | Monoamine oxidase                   |
| Avanafil*                                                     | 483.95           | 330784-47-9  | C <sub>23</sub> H <sub>26</sub> ClN <sub>7</sub> O <sub>3</sub>                 | Phosphodiesterase                   |
| GSK256066                                                     | 518.58           | 801312-28-7  | C <sub>27</sub> H <sub>26</sub> N <sub>4</sub> O <sub>5</sub> S                 | Phosphodiesterase                   |
| PF-3845                                                       | 456.46           | 1196109-52-0 | C <sub>24</sub> H <sub>23</sub> F <sub>3</sub> N <sub>4</sub> O <sub>2</sub>    | Fatty acid amide hydrolase          |
| Nepicastat (SYN-117) HCl                                      | 331.81           | 170151-24-3  | C <sub>14</sub> H <sub>16</sub> ClF <sub>2</sub> N <sub>3</sub> S               | Hydroxylase                         |
| CP-91149                                                      | 399.87           | 186392-40-5  | C <sub>21</sub> H <sub>22</sub> ClN <sub>3</sub> O <sub>3</sub>                 | Phosphorylase                       |
| Torcetrapib                                                   | 600.47           | 262352-17-0  | C <sub>26</sub> H <sub>25</sub> F <sub>9</sub> N <sub>2</sub> O <sub>4</sub>    | Cholesterol ester transfer protein  |
| Lonafarnib                                                    | 638.82           | 193275-84-2  | C <sub>27</sub> H <sub>31</sub> Br <sub>2</sub> ClN <sub>4</sub> O <sub>2</sub> | Farnesyltransferase                 |
| JNJ-1661010                                                   | 365.45           | 681136-29-8  | C <sub>19</sub> H <sub>19</sub> N <sub>5</sub> OS                               | Fatty acid amide hydrolase          |
| PF-4981517                                                    | 456.59           | 1390637-82-7 | C <sub>26</sub> H <sub>32</sub> N <sub>8</sub>                                  | Cytochrome P450                     |

| Product name                                                                           | Molecular weight | CAS number   | Formula                                                                                      | Target                                     |
|----------------------------------------------------------------------------------------|------------------|--------------|----------------------------------------------------------------------------------------------|--------------------------------------------|
| Evacetrapib<br>(LY2484595)                                                             | 638.65           | 1186486-62-3 | C <sub>31</sub> H <sub>36</sub> F <sub>6</sub> N <sub>6</sub> O <sub>2</sub>                 | Cholesterol ester transfer protein         |
| (R)-Nepicastat HCl                                                                     | 331.81           | 195881-94-8  | C <sub>14</sub> H <sub>16</sub> ClF <sub>2</sub> N <sub>3</sub> S                            | Hydroxylase                                |
| NLG919                                                                                 | 282.38           | 1402836-58-1 | C <sub>18</sub> H <sub>22</sub> N <sub>2</sub> O                                             | Indoleamine 2,3-dioxygenase                |
| AGI-5198                                                                               | 462.56           | 1355326-35-0 | C <sub>27</sub> H <sub>31</sub> FN <sub>4</sub> O <sub>2</sub>                               | Dehydrogenase                              |
| PF-04620110                                                                            | 396.44           | 1109276-89-2 | C <sub>21</sub> H <sub>24</sub> N <sub>4</sub> O <sub>4</sub>                                | Transferase                                |
| Deltarasin                                                                             | 603.75           | 1440898-61-2 | C <sub>40</sub> H <sub>37</sub> N <sub>5</sub> O                                             | Phosphodiesterase                          |
| Erastin                                                                                | 547.04           | 571203-78-6  | C <sub>30</sub> H <sub>31</sub> ClN <sub>4</sub> O <sub>4</sub>                              | Ferroptosis                                |
| Edoxaban                                                                               | 548.06           | 1229194-11-9 | C <sub>31</sub> H <sub>40</sub> ClN <sub>7</sub> O <sub>8</sub> S <sub>2</sub>               | Factor Xa                                  |
| LB42708                                                                                | 555.46           | 226929-39-1  | C <sub>30</sub> H <sub>27</sub> BrN <sub>4</sub> O <sub>2</sub>                              | Transferase                                |
| Darapladib (SB-480848)                                                                 | 666.77           | 356057-34-6  | C <sub>36</sub> H <sub>38</sub> F <sub>4</sub> N <sub>4</sub> O <sub>2</sub> S               | Phospholipase (e.g. PLA)                   |
| U73122                                                                                 | 464.64           | 112648-68-7  | C <sub>29</sub> H <sub>40</sub> N <sub>2</sub> O <sub>3</sub>                                | Phospholipase (e.g. PLA)                   |
| Apremilast (CC-10004)                                                                  | 460.5            | 608141-41-9  | C <sub>22</sub> H <sub>24</sub> N <sub>2</sub> O <sub>7</sub> S                              | Phosphodiesterase                          |
| Fostamatinib (R788)                                                                    | 580.46           | 901119-35-5  | C <sub>23</sub> H <sub>26</sub> FN <sub>6</sub> O <sub>9</sub> P                             | Spleen tyrosine kinase                     |
| AP26113                                                                                | 529.01           | 1197958-12-5 | C <sub>26</sub> H <sub>34</sub> ClN <sub>6</sub> O <sub>2</sub> P                            | Anaplastic lymphoma kinase                 |
| GDC-0941                                                                               | 513.64           | 957054-30-7  | C <sub>23</sub> H <sub>27</sub> N <sub>7</sub> O <sub>3</sub> S <sub>2</sub>                 | Phosphoinositide 3-kinase                  |
| Tipifarnib                                                                             | 489.4            | 192185-72-1  | C <sub>27</sub> H <sub>22</sub> Cl <sub>2</sub> N <sub>4</sub> O                             | Farnesyltransferase, Ras                   |
| <b>Compounds containing primary and/or secondary but without tertiary amino groups</b> |                  |              |                                                                                              |                                            |
| Cilostazol*                                                                            | 369.46           | 73963-72-1   | C <sub>20</sub> H <sub>27</sub> N <sub>5</sub> O <sub>2</sub>                                | Phosphodiesterase                          |
| Rolipram*                                                                              | 275.34           | 61413-54-5   | C <sub>16</sub> H <sub>21</sub> NO <sub>3</sub>                                              | Phosphodiesterase                          |
| Topiramate*                                                                            | 339.36           | 97240-79-4   | C <sub>12</sub> H <sub>21</sub> NO <sub>8</sub> S                                            | Carbonic anhydrase                         |
| Pralatrexate*                                                                          | 477.47           | 146464-95-1  | C <sub>23</sub> H <sub>23</sub> N <sub>7</sub> O <sub>5</sub>                                | Dihydrofolate reductase                    |
| Pimobendan*                                                                            | 334.37           | 74150-27-9   | C <sub>19</sub> H <sub>18</sub> N <sub>4</sub> O <sub>2</sub>                                | Phosphodiesterase                          |
| Irsogladine*                                                                           | 256.09           | 57381-26-7   | C <sub>9</sub> H <sub>7</sub> Cl <sub>2</sub> N <sub>5</sub>                                 | Phosphodiesterase                          |
| Pyrimethamine*                                                                         | 248.71           | 58-14-0      | C <sub>12</sub> H <sub>13</sub> ClN <sub>4</sub>                                             | Dihydrofolate reductase                    |
| Pioglitazone HCl*                                                                      | 392.9            | 112529-15-4  | C <sub>19</sub> H <sub>21</sub> ClN <sub>2</sub> O <sub>3</sub> S                            | Peroxisome proliferator-activated receptor |
| Roflumilast*                                                                           | 403.21           | 162401-32-3  | C <sub>17</sub> H <sub>14</sub> Cl <sub>2</sub> F <sub>2</sub> N <sub>2</sub> O <sub>3</sub> | Phosphodiesterase                          |
| Milrinone*                                                                             | 211.22           | 78415-72-2   | C <sub>12</sub> H <sub>9</sub> N <sub>3</sub> O                                              | ATPase                                     |
| Brinzolamide*                                                                          | 383.51           | 138890-62-7  | C <sub>12</sub> H <sub>21</sub> N <sub>3</sub> O <sub>5</sub> S <sub>3</sub>                 | Carbonic anhydrase                         |
| Methazolamide*                                                                         | 236.27           | 554-57-4     | C <sub>5</sub> H <sub>8</sub> N <sub>4</sub> O <sub>3</sub> S <sub>2</sub>                   | Carbonic anhydrase                         |
| Gimeracil*                                                                             | 145.54           | 103766-25-2  | C <sub>5</sub> H <sub>4</sub> ClNO <sub>2</sub>                                              | Dehydrogenase                              |

| Product name                             | Molecular weight | CAS number    | Formula                                                                                     | Target                                     |
|------------------------------------------|------------------|---------------|---------------------------------------------------------------------------------------------|--------------------------------------------|
| Rasagiline mesylate*                     | 267.34           | 161735-79-1   | C <sub>13</sub> H <sub>17</sub> NO <sub>3</sub> S                                           | Monoamine oxidase                          |
| S-(+)-Rolipram*                          | 275.34           | 85416-73-5    | C <sub>16</sub> H <sub>21</sub> NO <sub>3</sub>                                             | Phosphodiesterase                          |
| Phosphoramidon disodium salt             | 588.48           | 164204-38-0   | C <sub>23</sub> H <sub>34</sub> N <sub>3</sub> Na <sub>2</sub> O <sub>10</sub> P            | Metalloendopeptidase                       |
| Safinamide mesylate                      | 398.45           | 202825-46-5   | C <sub>18</sub> H <sub>23</sub> FN <sub>2</sub> O <sub>5</sub> S                            | Monoamine oxidase                          |
| Liproxstatin-1                           | 340.85           | 950455-15-9   | C <sub>19</sub> H <sub>21</sub> ClN <sub>4</sub>                                            | Ferroptosis                                |
| Epacadostat (INCB024360)                 | 438.23           | 1204669-58-8  | C <sub>11</sub> H <sub>13</sub> BrFN <sub>7</sub> O <sub>4</sub> S                          | Indoleamine 2,3-dioxygenase                |
| GSK3787                                  | 392.78           | 188591-46-0   | C <sub>15</sub> H <sub>12</sub> ClF <sub>3</sub> N <sub>2</sub> O <sub>3</sub> S            | Peroxisome proliferator-activated receptor |
| WY-14643 (Pirixinic acid)                | 323.8            | 50892-23-4    | C <sub>14</sub> H <sub>14</sub> ClN <sub>3</sub> O <sub>2</sub> S                           | Peroxisome proliferator-activated receptor |
| PluriSIn #1 (NSC 14613)                  | 213.24           | 91396-88-2    | C <sub>12</sub> H <sub>11</sub> N <sub>3</sub> O                                            | Dehydrogenase                              |
| TAK-700 (Orteronel)                      | 307.35           | 566939-85-3   | C <sub>18</sub> H <sub>17</sub> N <sub>3</sub> O <sub>2</sub>                               | Cytochrome P450                            |
| Telotristat etiprate (LX 1606 Hippurate) | 754.15           | 11137608-69-5 | C <sub>36</sub> H <sub>35</sub> ClF <sub>3</sub> N <sub>7</sub> O <sub>6</sub>              | Hydroxylase                                |
| UK 383367                                | 324.38           | 348622-88-8   | C <sub>15</sub> H <sub>24</sub> N <sub>4</sub> O <sub>4</sub>                               | Procollagen C proteinase                   |
| INCB024360                               | 271.64           | 914471-09-3   | C <sub>9</sub> H <sub>7</sub> ClFN <sub>5</sub> O <sub>2</sub>                              | Indoleamine 2,3-dioxygenase                |
| URB597                                   | 338.4            | 546141-08-6   | C <sub>20</sub> H <sub>22</sub> N <sub>2</sub> O <sub>3</sub>                               | Fatty acid amide hydrolase                 |
| A922500                                  | 428.48           | 959122-11-3   | C <sub>26</sub> H <sub>24</sub> N <sub>2</sub> O <sub>4</sub>                               | Diacylglycerol Acyltransferase 1           |
| Dalcetrapib (JTT-705, RO4607381)         | 389.59           | 211513-37-0   | C <sub>23</sub> H <sub>35</sub> NO <sub>2</sub> S                                           | Cholesterol ester transfer protein         |
| AGI-6780                                 | 481.51           | 1432660-47-3  | C <sub>21</sub> H <sub>18</sub> F <sub>3</sub> N <sub>3</sub> O <sub>3</sub> S <sub>2</sub> | Dehydrogenase                              |
| Ferrostatin-1 (Fer-1)                    | 262.35           | 347174-05-4   | C <sub>15</sub> H <sub>22</sub> N <sub>2</sub> O <sub>2</sub>                               | Ferroptosis                                |
| Vidofludimus                             | 355.36           | 717824-30-1   | C <sub>20</sub> H <sub>18</sub> FNO <sub>4</sub>                                            | Dehydrogenase                              |
| FTI 277 HCl                              | 484.07           | 180977-34-8   | C <sub>22</sub> H <sub>30</sub> ClN <sub>3</sub> O <sub>3</sub> S <sub>2</sub>              | Transferase                                |
| D4476                                    | 398.41           | 301836-43-1   | C <sub>23</sub> H <sub>18</sub> N <sub>4</sub> O <sub>3</sub>                               | Casein kinase 1                            |
| U-104                                    | 309.32           | 178606-66-1   | C <sub>13</sub> H <sub>12</sub> FN <sub>3</sub> O <sub>3</sub> S                            | Carbonic anhydrase                         |
| <b>Compounds with no amino group</b>     |                  |               |                                                                                             |                                            |
| Voriconazole*                            | 349.31           | 137234-62-9   | C <sub>16</sub> H <sub>14</sub> F <sub>3</sub> N <sub>5</sub> O                             | Cytochrome P450                            |
| Isotretinoin*                            | 300.44           | 4759-48-2     | C <sub>20</sub> H <sub>28</sub> O <sub>2</sub>                                              | Hydroxylase                                |
| Trilostane*                              | 329.43           | 13647-35-3    | C <sub>20</sub> H <sub>27</sub> NO <sub>3</sub>                                             | Dehydrogenase                              |
| Lovastatin*                              | 404.54           | 75330-75-5    | C <sub>24</sub> H <sub>36</sub> O <sub>5</sub>                                              | HMG-CoA reductase                          |

| Product name        | Molecular weight | CAS number   | Formula                                                                       | Target                                     |
|---------------------|------------------|--------------|-------------------------------------------------------------------------------|--------------------------------------------|
| Tioxolone*          | 168.17           | 4991-65-5    | C <sub>7</sub> H <sub>4</sub> O <sub>3</sub> S                                | Carbonic anhydrase                         |
| Pravastatin sodium* | 446.51           | 81131-70-6   | C <sub>23</sub> H <sub>35</sub> NaO <sub>7</sub>                              | HMG-CoA reductase                          |
| Tolcapone*          | 273.24           | 134308-13-7  | C <sub>14</sub> H <sub>11</sub> NO <sub>5</sub>                               | Transferase                                |
| Avasimibe           | 501.72           | 166518-60-1  | C <sub>29</sub> H <sub>43</sub> NO <sub>4</sub> S                             | Cytochrome P450                            |
| PF-2545920          | 392.45           | 1292799-56-4 | C <sub>25</sub> H <sub>20</sub> N <sub>4</sub> O                              | Phosphodiesterase                          |
| GW0742              | 471.49           | 317318-84-6  | C <sub>21</sub> H <sub>17</sub> F <sub>4</sub> NO <sub>3</sub> S <sub>2</sub> | Peroxisome proliferator-activated receptor |
| Cilomilast          | 343.42           | 153259-65-5  | C <sub>20</sub> H <sub>25</sub> NO <sub>4</sub>                               | Phosphodiesterase                          |
| Apigenin            | 270.24           | 520-36-5     | C <sub>15</sub> H <sub>10</sub> O <sub>5</sub>                                | Cytochrome P450                            |
| Baicalein           | 270.24           | 491-67-8     | C <sub>15</sub> H <sub>10</sub> O <sub>5</sub>                                | Cytochrome P450                            |
| Icariin             | 676.66           | 489-32-7     | C <sub>33</sub> H <sub>40</sub> O <sub>15</sub>                               | Phosphodiesterase                          |
| Luteolin            | 286.24           | 491-70-3     | C <sub>15</sub> H <sub>10</sub> O <sub>6</sub>                                | Phosphodiesterase                          |
| Naringenin          | 272.25           | 480-41-1     | C <sub>15</sub> H <sub>12</sub> O <sub>5</sub>                                | Cytochrome P450                            |
| Alizarin            | 240.21           | 72-48-0      | C <sub>14</sub> H <sub>8</sub> O <sub>4</sub>                                 | Cytochrome P450                            |
| CPI-613             | 388.59           | 95809-78-2   | C <sub>22</sub> H <sub>28</sub> O <sub>2</sub> S <sub>2</sub>                 | Dehydrogenase                              |
| Xanthohumol         | 354.4            | 6754-58-1    | C <sub>21</sub> H <sub>22</sub> O <sub>5</sub>                                | Cyclooxygenase                             |

\*FDA approved drugs
